# Supplementary material
Source: Springer Nature journal article supplement (https://www.springermedizin.de/resource/supplementary/12906_2010_354_MOESM1_ESM.pdf/9519502)

1 2 3 4 5 6 7 8 9 10

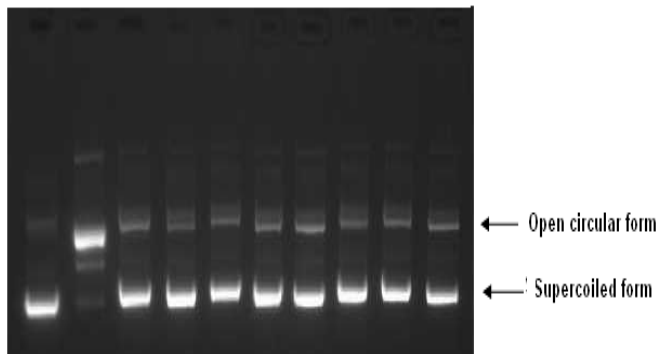

**(a)**

1 2 3 4 5 6 7 8 9 10

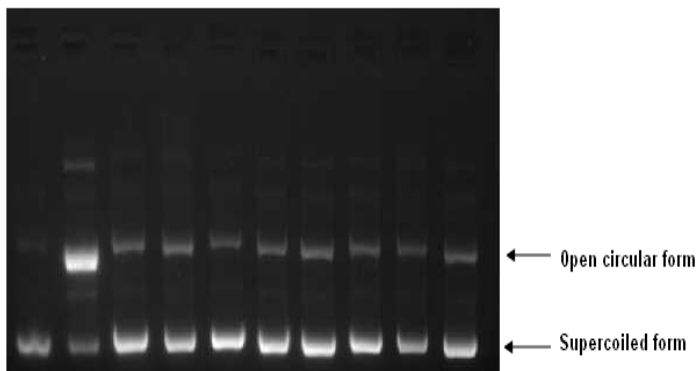

**(b)**

Supplement: MOESM1 [file 9519502]
